# Supplementary material
Source: publisher figshare collection journal article supplement (https://acs.figshare.com/ndownloader/files/21359619)
Supplement: Supplementary file 1 [file 21359619]

# Separation of Benzene and Cyclohexane by Nonporous Adaptive Crystals of a Hybrid[3]arene

Jiong Zhou, Guocan Yu,\* Qing Li, Mengbin Wang, and Feihe Huang\*

State Key Laboratory of Chemical Engineering, Center for Chemistry of High-Performance & Novel Materials,  
Department of Chemistry, Zhejiang University, Hangzhou 310027, P. R. China; Fax and Tel: +86-571-8795-3189;

Email: [guocanyu@zju.edu.cn](mailto:guocanyu@zju.edu.cn); [fhuang@zju.edu.cn](mailto:fhuang@zju.edu.cn)

## Supporting Information (18 pages)

|                                                                                 |     |
|---------------------------------------------------------------------------------|-----|
| 1. <i>Materials</i>                                                             | S2  |
| 2. <i>Methods</i>                                                               | S2  |
| 3. <i>Synthesis of Hybrid[3]arene 1</i>                                         | S4  |
| 4. <i>Crystallographic Data</i>                                                 | S5  |
| 5. <i>Characterization of Activated 1 Crystals (1<math>\alpha</math>)</i>       | S6  |
| 6. <i>Single-Component Bz/Cy Adsorption Experiments</i>                         | S8  |
| 7. <i>Noncovalent Interactions Analysis in Single Crystal Structure of Bz@1</i> | S14 |
| 8. <i>Uptake from a Bz/Cy Mixture by 1<math>\alpha</math></i>                   | S15 |
| 9. <i>Recyclability of 1<math>\alpha</math></i>                                 | S17 |
| 10. <i>References</i>                                                           | S18 |

## 1. Materials

All chemicals, including benzene (**Bz**) and cyclohexane (**Cy**), were purchased and used as received. Hybrid[3]arene (**1**) was synthesized as described previously.<sup>S1</sup> Activated crystalline **1** (**1 $\alpha$** ) was recrystallized from acetone and dried under vacuum at 150 °C overnight.

## 2. Methods

### 2.1. Solution NMR

Solution <sup>1</sup>H NMR spectra were recorded at 400.13 MHz using a Bruker Avance 400 NMR spectrometer.

### 2.2. Powder X-Ray Diffraction

Powder X-ray diffraction (PXRD) data were collected on a Rigaku Ultimate-IV X-ray diffractometer operating at 40 kV/30 mA using the Cu K $\alpha$  line ( $\lambda = 1.5418$  Å). Data were measured over the range of 5–45° in 5°/min steps over 8 min.

### 2.3. Thermogravimetric Analysis

Thermogravimetric analysis (TGA) was carried out using a Q5000IR analyzer (TA Instruments) with an automated vertical overhead thermobalance. The samples were heated at 10 °C/min using N<sub>2</sub> as the protective gas.

### 2.4. Single Crystal Growth

Single crystals of **Bz@1** were grown by slow evaporation: 5 mg of dry **1** were put in a small vial where 1 mL of **Bz** was added. The resultant transparent solution was allowed to evaporate slowly to give colorless crystals in 2 to 3 days.

### 2.5. Single Crystal X-ray Diffraction

Single crystal X-ray diffraction data were collected on a Bruker D8 VENTURE CMOS X-ray diffractometer with graphite monochromated Mo K $\alpha$  radiation ( $\lambda = 0.71073$  Å).

### 2.6. Gas Sorption Measurement

Low-pressure gas adsorption measurements were performed on a Micromeritics Accelerated Surface Area and Porosimetry System (ASAP) 2020 surface area analyzer. Samples were degassed under dynamic vacuum for 12 h at 60 °C prior to each measurement. N<sub>2</sub> isotherms were measured using a liquid nitrogen bath (77 K).

## 2.7. Vapor Sorption Measurement

**Bz** and **Cy** sorption isotherms were measured via a Micromeritics 3Flex instrument. Samples were degassed under dynamic vacuum for 12 hours at 80 °C prior to each measurement. The isotherms were collected at 25 °C by monitoring the volume changes.

## 2.8. Gas Chromatography

Head Space Gas Chromatographic (HS-GC) Analysis: HS-GC measurements were carried out using an Agilent 7890B instrument configured with an FID detector and a DB-624 column (30 m × 0.53 mm × 3.0 µm). Samples were analyzed using headspace injections and were performed by incubating the sample at 100 °C for 10 min followed by sampling 1 mL of the headspace. The following GC method was used: the oven was programmed from 50 °C ramped in 10 °C min<sup>-1</sup> increments to 150 °C with 15 min hold; the total run time was 25 min; the injection temperature was 250 °C; the detector temperature was 280 °C with nitrogen, air, and make-up flow rates of 35, 350, and 35 mL min<sup>-1</sup>, respectively; the helium (carrier gas) flow rate was 3.0 mL min<sup>-1</sup>. The samples were injected in the split mode (30:1).

### 3. Synthesis of Hybrid[3]arene **1**

*Scheme S1.* Synthetic Route to Hybrid[3]arene **1**

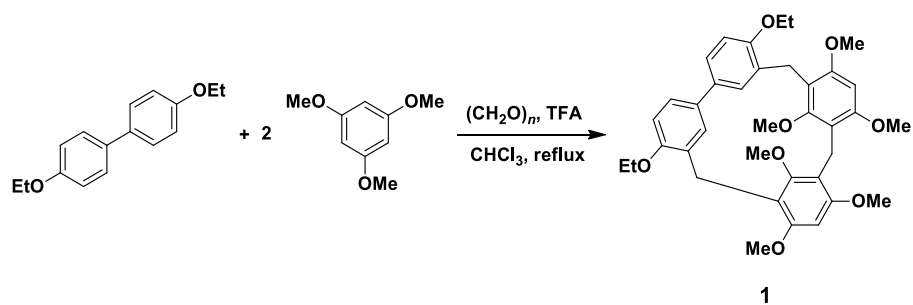

Hybrid[3]arene **1** was prepared according to a literature procedure.<sup>S1</sup>

#### 4. Crystallographic Data

**Table S1.** Experimental single crystal X-ray data for **Bz@1**.

| Formula                                               | <b>Bz@1</b>                                                     |
|-------------------------------------------------------|-----------------------------------------------------------------|
| Crystallization Solvent                               | benzene                                                         |
| Collection Temperature (K)                            | 273                                                             |
| Formula                                               | C <sub>43</sub> H <sub>48</sub> O <sub>8</sub>                  |
| Formula Weight                                        | 692.81                                                          |
| Crystal System                                        | Triclinic                                                       |
| Space Group                                           | P-1                                                             |
| <i>a</i> [Å]                                          | 10.7525(3)                                                      |
| <i>b</i> [Å]                                          | 13.2311(4)                                                      |
| <i>c</i> [Å]                                          | 15.5424(4)                                                      |
| $\alpha$ [°]                                          | 105.2250(10)                                                    |
| $\beta$ [°]                                           | 105.9030(10)                                                    |
| $\gamma$ [°]                                          | 108.3520(10)                                                    |
| <i>V</i> [Å <sup>3</sup> ]                            | 1865.15(9)                                                      |
| <i>Z</i>                                              | 2                                                               |
| <i>D</i> <sub>calcd</sub> [g cm <sup>-3</sup> ]       | 1.234                                                           |
| Absorption coefficient (mm <sup>-1</sup> )            | 0.084                                                           |
| <i>F</i> (000)                                        | 740                                                             |
| Theta range [°]                                       | 2.90–26.13                                                      |
| Reflections collected / unique                        | 11849 / 7373 [ <i>R</i> (int) = 0.0158]                         |
| Data / restraints / parameters                        | 7373 / 0 / 468                                                  |
| Final <i>R</i> indices [ <i>I</i> > 2σ( <i>I</i> )]   | <i>R</i> <sub>1</sub> = 0.1118, <i>wR</i> <sub>2</sub> = 0.1118 |
| <i>R</i> indices (all data)                           | <i>R</i> <sub>1</sub> = 0.1186, <i>wR</i> <sub>2</sub> = 0.1186 |
| Goodness-of-fit on <i>F</i> <sup>2</sup>              | 1.013                                                           |
| Largest difference peak and hole [e.Å <sup>-3</sup> ] | 0.414 and -0.341                                                |
| CCDC                                                  | 1962323                                                         |

## 5. Characterization of Activated 1 Crystals ( $1\alpha$ )

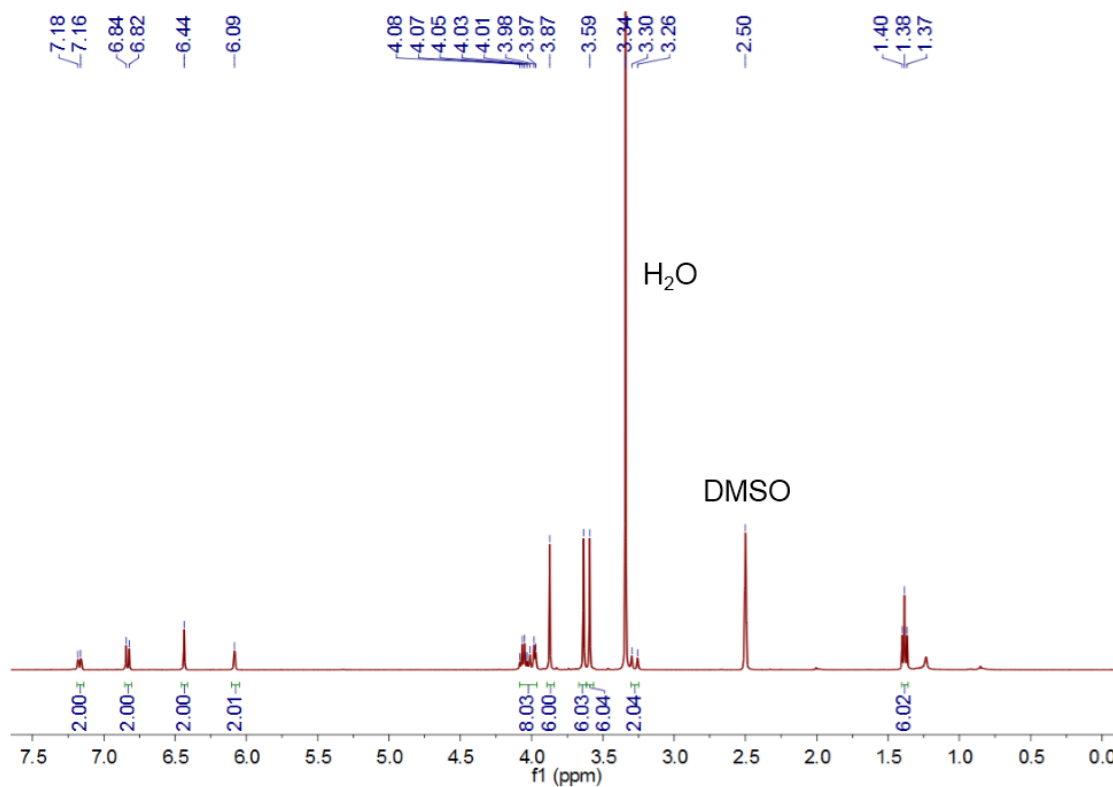

**Figure S1.**  $^1\text{H}$  NMR spectrum (400 MHz,  $\text{DMSO-}d_6$ , 293 K) of  $1\alpha$ .

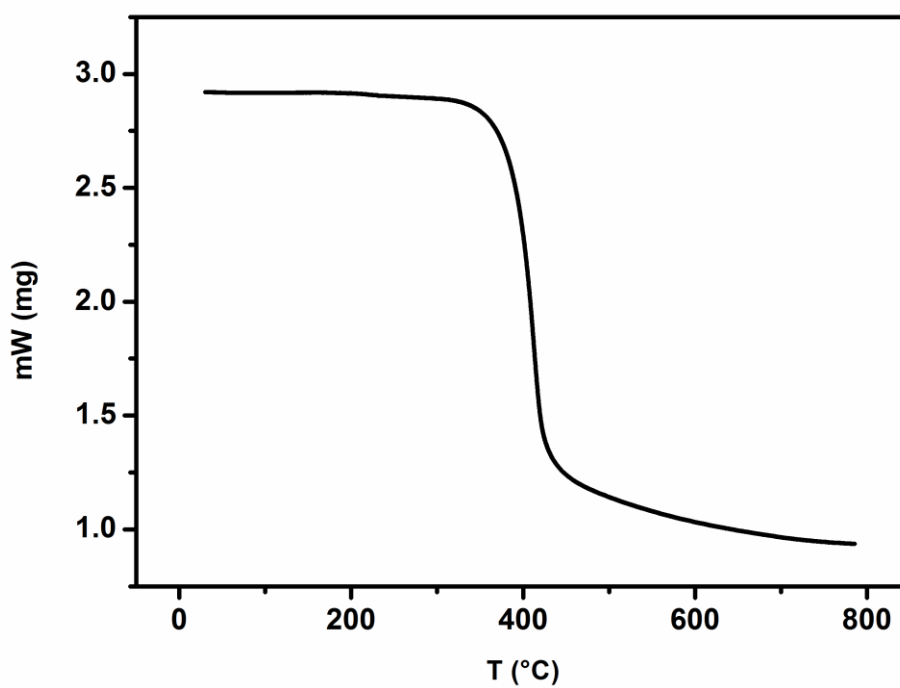

**Figure S2.** Thermogravimetric analysis of  $1\alpha$ .

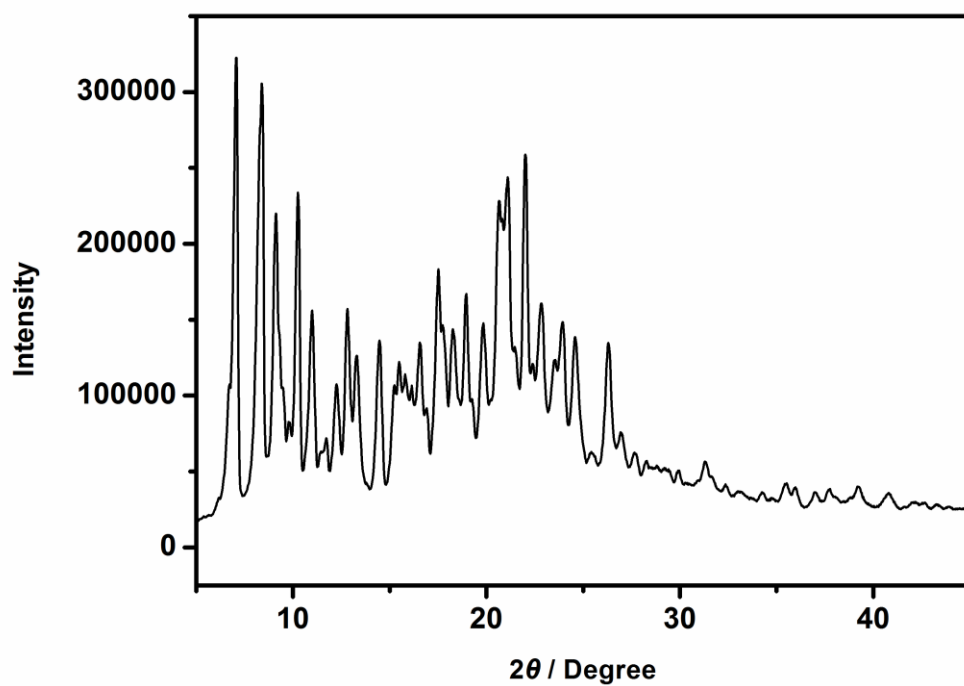

**Figure S3.** Powder X-ray diffraction pattern of **1α**.

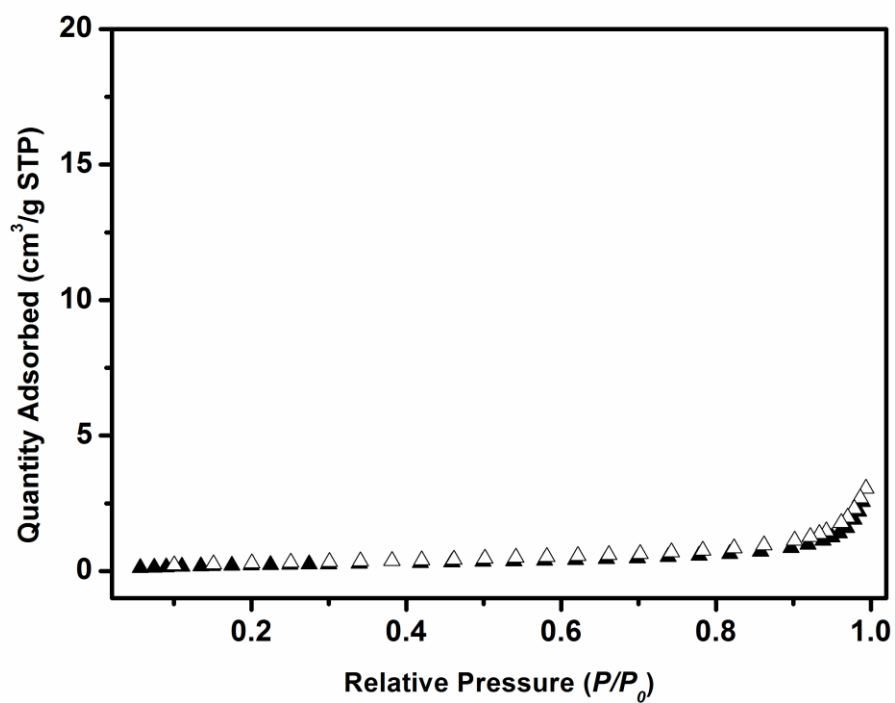

**Figure S4.** N<sub>2</sub> adsorption isotherm of **1α**. The BET surface area value is 0.8995 m<sup>2</sup>/g. Adsorption, closed symbols; desorption, open symbols.

## 6. Single-Component Bz/Cy Adsorption Experiments

$^1\text{H}$  NMR experiments were performed by dissolving **1a** after vapor sorption in  $\text{DMSO-}d_6$ . TGA profiles were recorded using **1a** after vapor sorption.

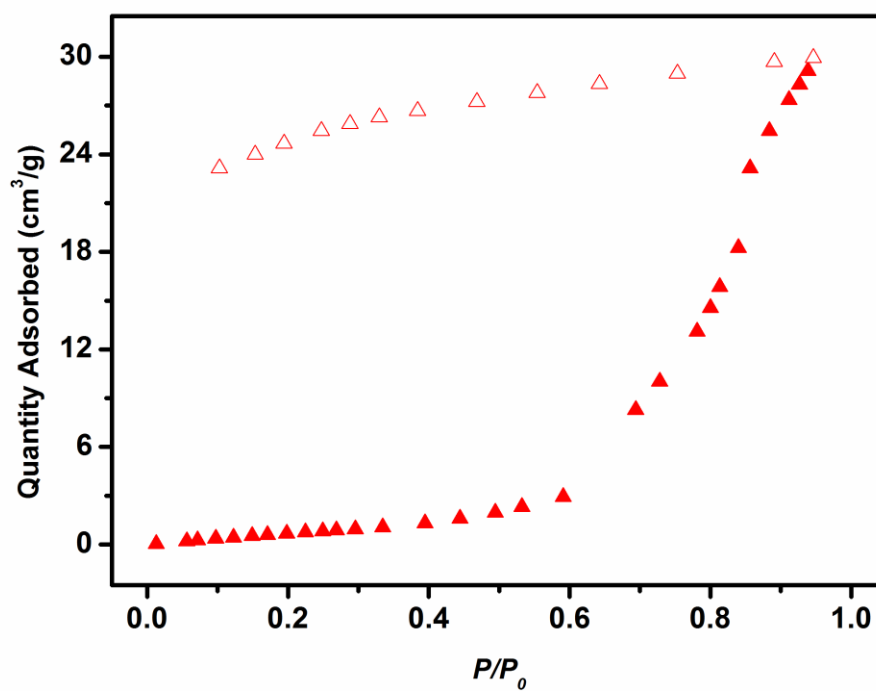

**Figure S5.** Vapor sorption isotherms of **1a** towards **Bz**. Adsorption, solid symbols; desorption, open symbols.



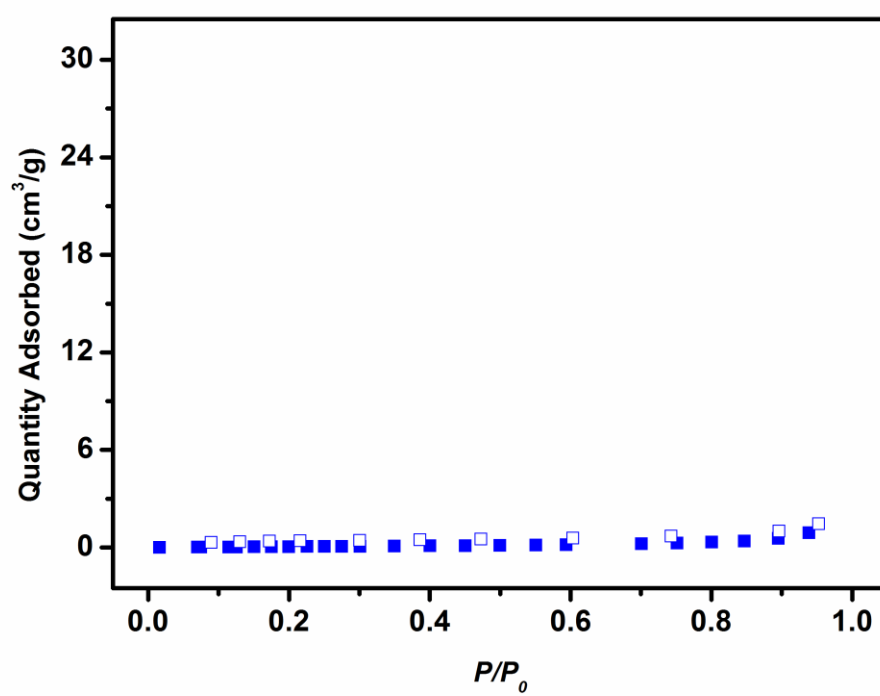

**Figure S6.** Vapor sorption isotherms of **1 $\alpha$**  towards **Cy**. Adsorption, solid symbols; desorption, open symbols.

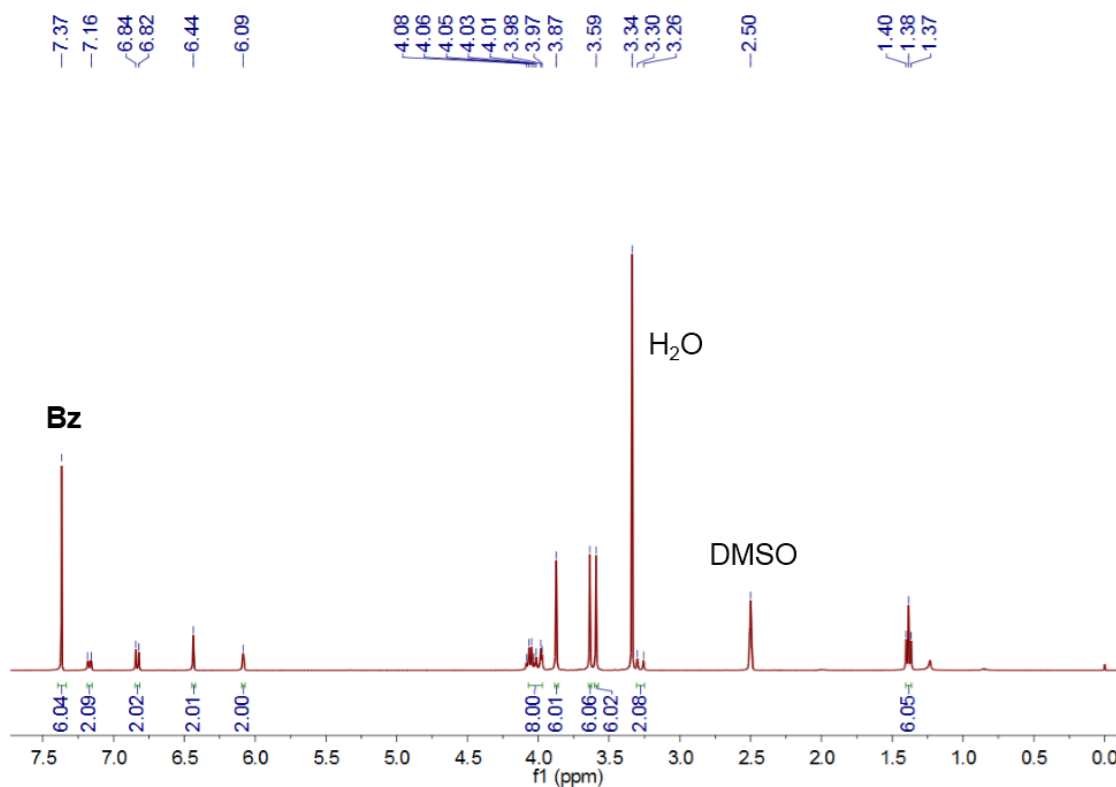

**Figure S7.** <sup>1</sup>H NMR spectrum (400 MHz, DMSO-*d*<sub>6</sub>, 293 K) of **1a** after sorption of **Bz** vapor for 12 h.

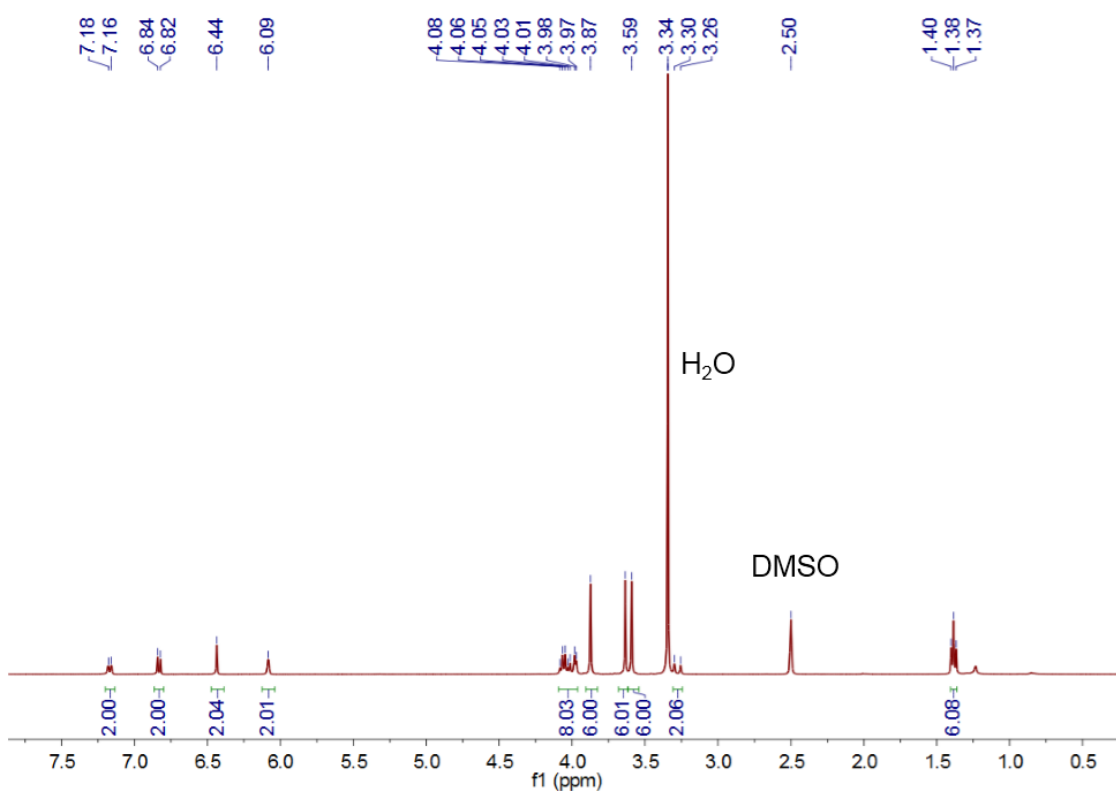

**Figure S8.** <sup>1</sup>H NMR spectrum (400 MHz, DMSO-*d*<sub>6</sub>, 293 K) of **1a** after sorption of **Cy** vapor for 12 h.

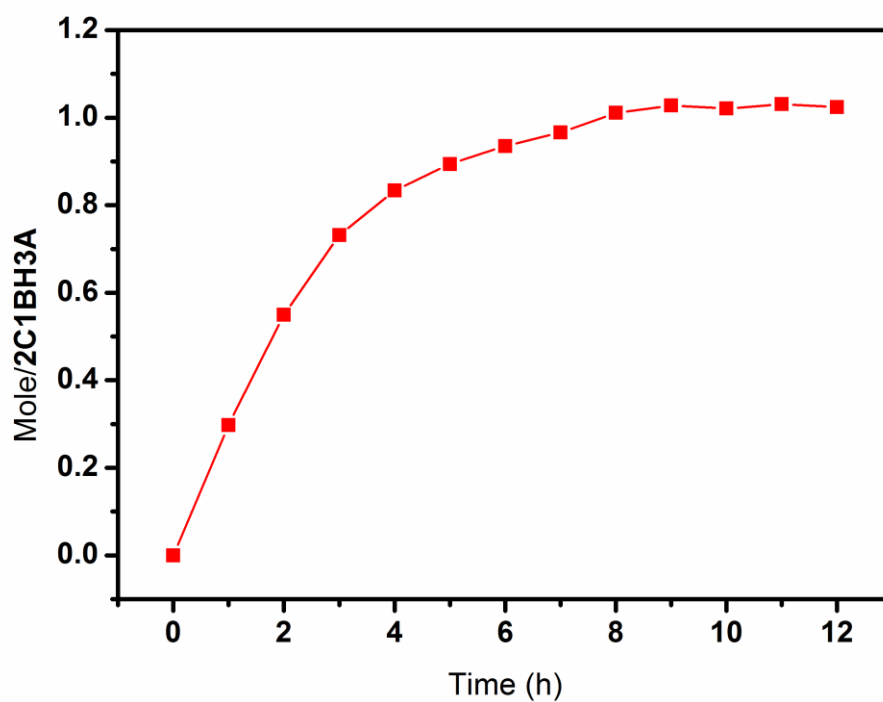

**Figure S9.** Time-dependent solid–vapor sorption plots of **1α** for single-component **Bz** vapor.

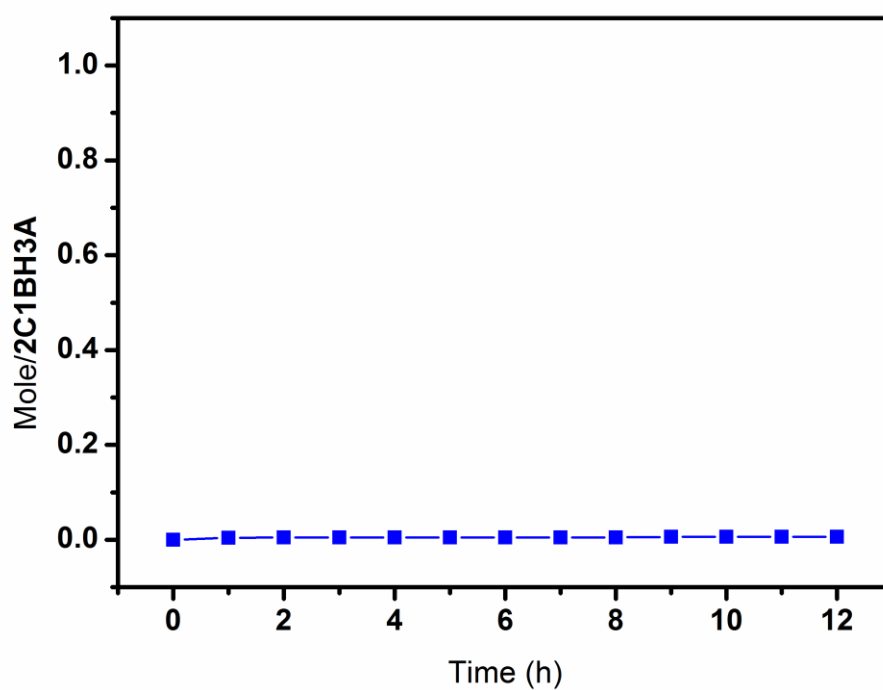

**Figure S10.** Time-dependent solid–vapor sorption plots of **1α** for single-component **Cy** vapor.

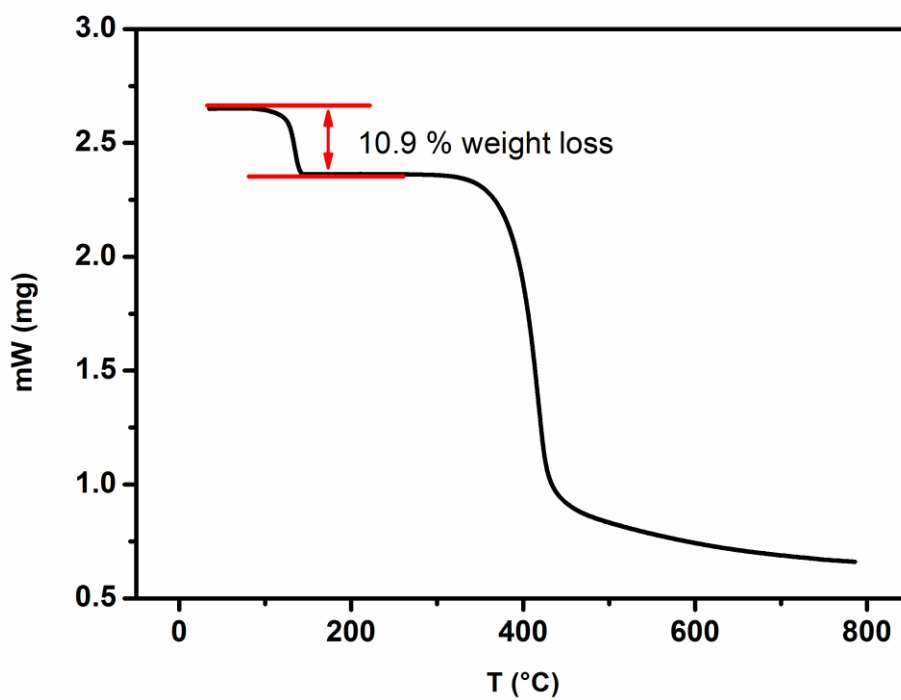

**Figure S11.** Thermogravimetric analysis of **1α** after sorption of **Bz** vapor for 12 h. The weight loss below 150 °C can be calculated as one **Bz** molecule per **1** molecule.

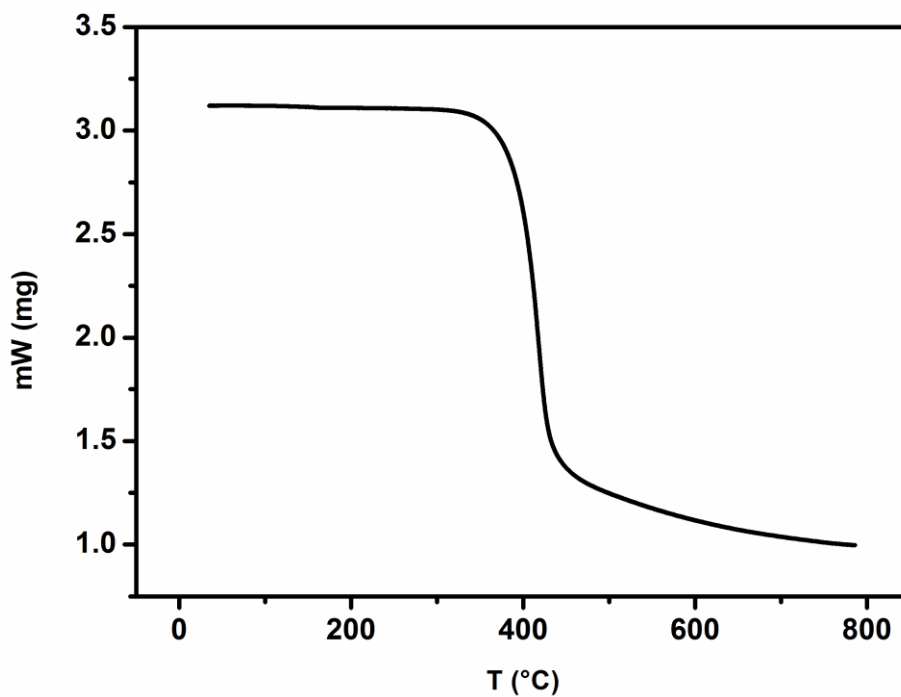

**Figure S12.** Thermogravimetric analysis of **1α** after sorption of **Cy** vapor for 12 h.

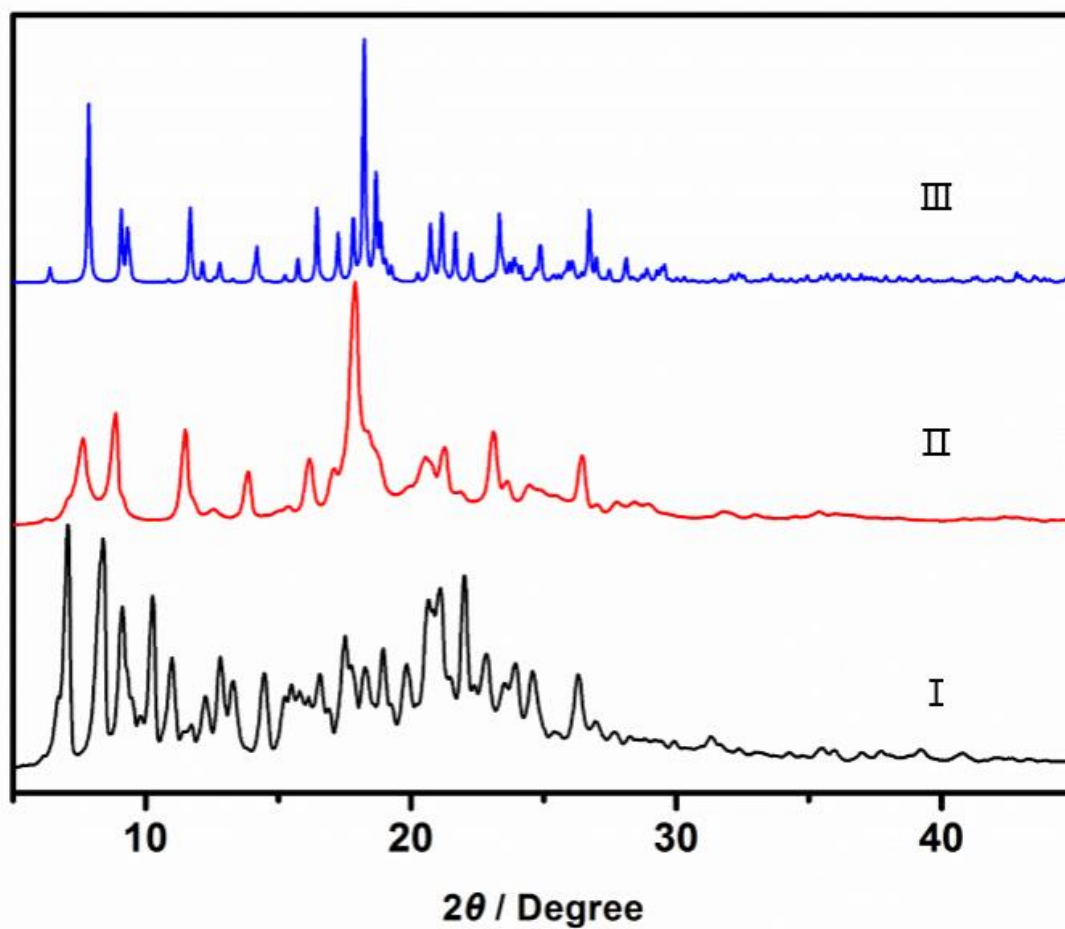

**Figure S13.** PXRD patterns of **1**: (I) original **1 $\alpha$** ; (II) after adsorption of **Bz** vapor; (III) simulated from single crystal structure of **Bz@1**.

## 7. Noncovalent Interactions Analysis in Single Crystal Structure of Bz@1

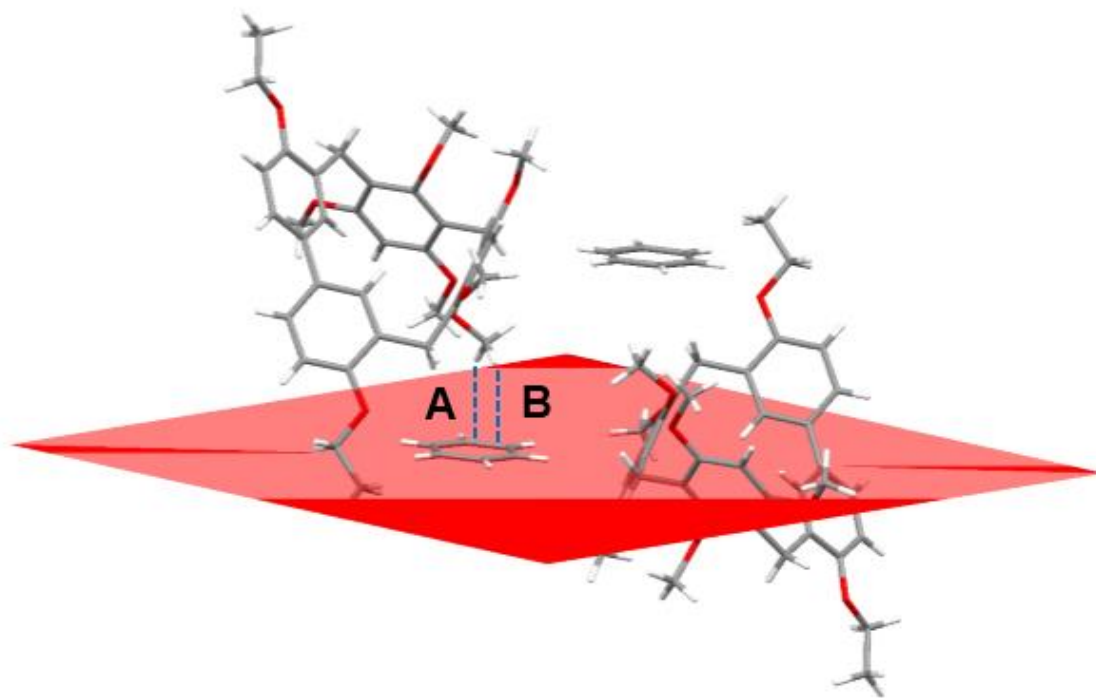

**Figure S14.** Illustration of C–H $\cdots\pi$  interactions between two H atoms on the methyl group of **1** and the benzene ring on **Bz**. H– $\pi$ -plane distances: **A** = 2.712 Å; **B** = 2.932 Å.

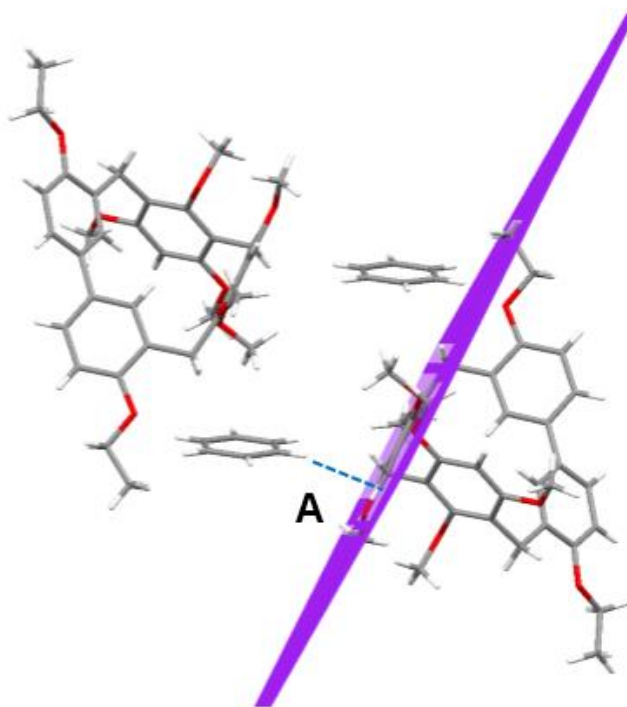

**Figure S15.** Illustration of a C–H $\cdots\pi$  interaction between an H atom on **Bz** and a phenyl ring of **1**. H– $\pi$ -plane distance: **A** = 2.651 Å.

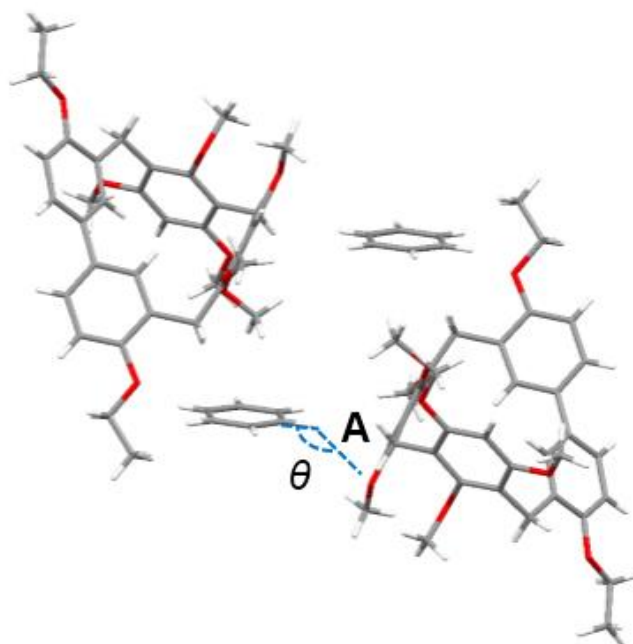

**Figure S16.** Illustration of a C–H···O interaction between an O atom of **1** and an aromatic H atom of **Bz**. H–O distance: **A** = 2.982 Å; C–H···O angle:  $\theta$  = 125.34°.

## 8. Uptake from a Bz/Cy Mixture by **1 $\alpha$**

An open 5 mL vial containing 0.0200 g of guest-free **1 $\alpha$**  adsorbent was placed in a sealed 20 mL vial containing 1 mL of an equimolar **Bz**/**Cy** mixture. Uptake by **1 $\alpha$**  was measured hour by hour by completely dissolving the crystals and measuring the ratio of **Bz** or **Cy** to **1** by  $^1\text{H}$  NMR. The relative uptakes of **Bz** and **Cy** by **1 $\alpha$**  was also measured by heating the crystals to release the adsorbed vapor and detecting the relative amounts of **Bz** and **Cy** in the released vapor using gas chromatography.

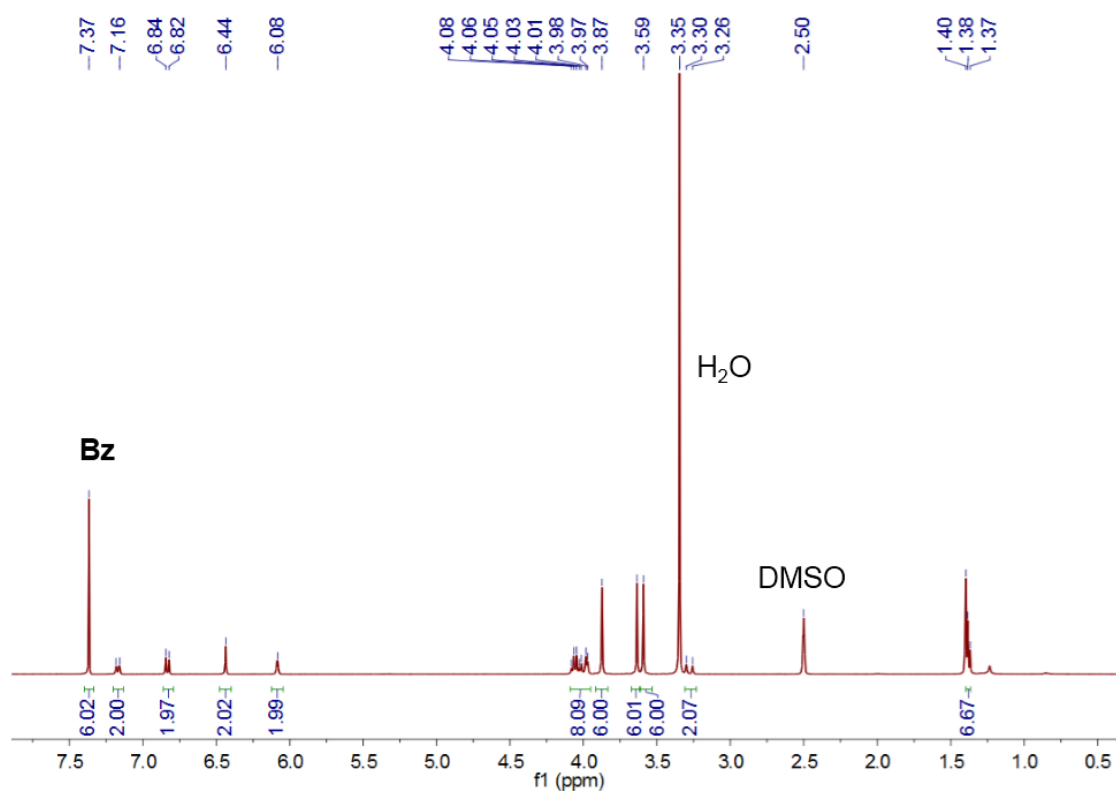

**Figure S17.**  $^1\text{H}$  NMR spectrum (400 MHz,  $\text{DMSO-}d_6$ , 293 K) of **1 $\alpha$**  after sorption of an equimolar **Bz**/**Cy** mixture vapor for 12 h.

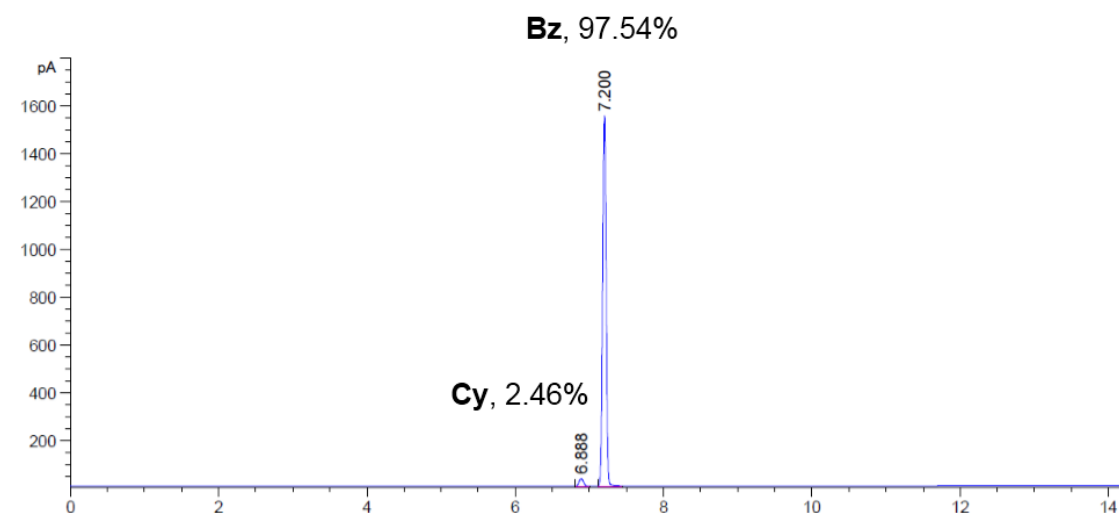

**Figure S18.** Relative uptakes of **Bz** and **Cy** adsorbed in **1 $\alpha$**  for 12 h using head space gas chromatography.



## 9. Recyclability of **1 $\alpha$**

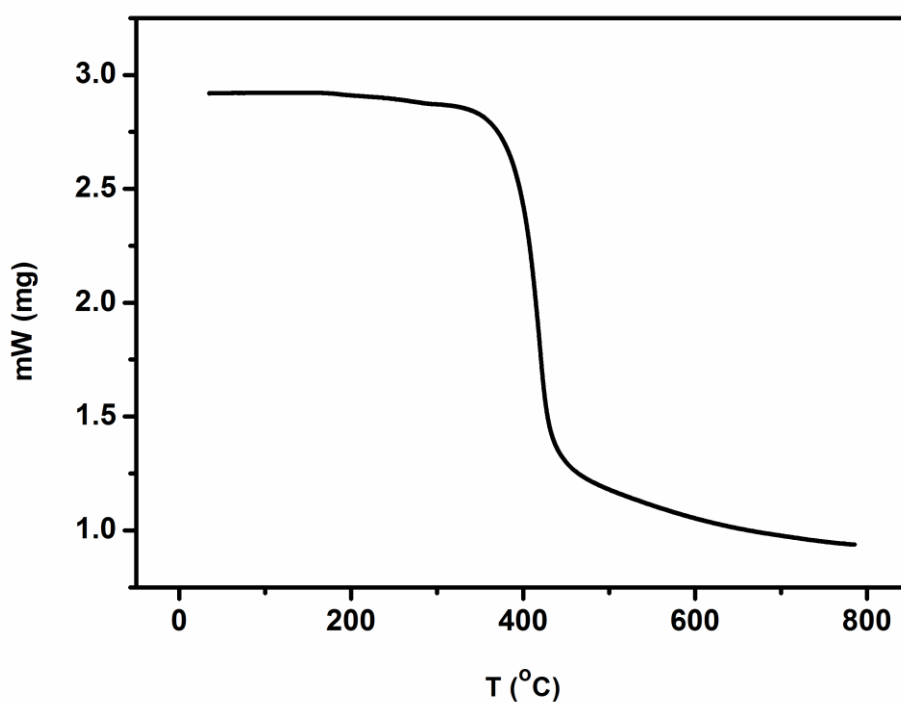

**Figure S19.** Thermogravimetric analysis of **Bz@1 $\alpha$**  after heating at 100 °C under vacuum for 2 h.

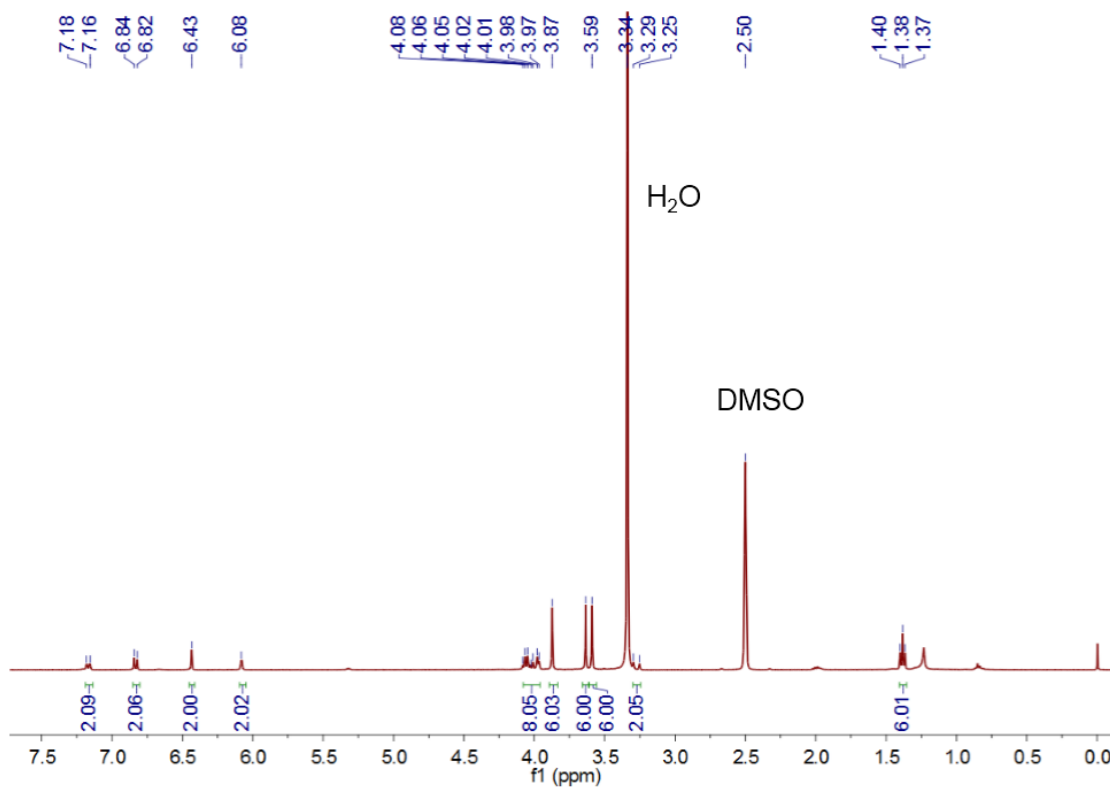

**Figure S20.**  $^1\text{H}$  NMR spectrum (400 MHz,  $\text{DMSO-}d_6$ , 293 K) of **Bz@1 $\alpha$**  after heating at 100 °C under vacuum for 2 h.

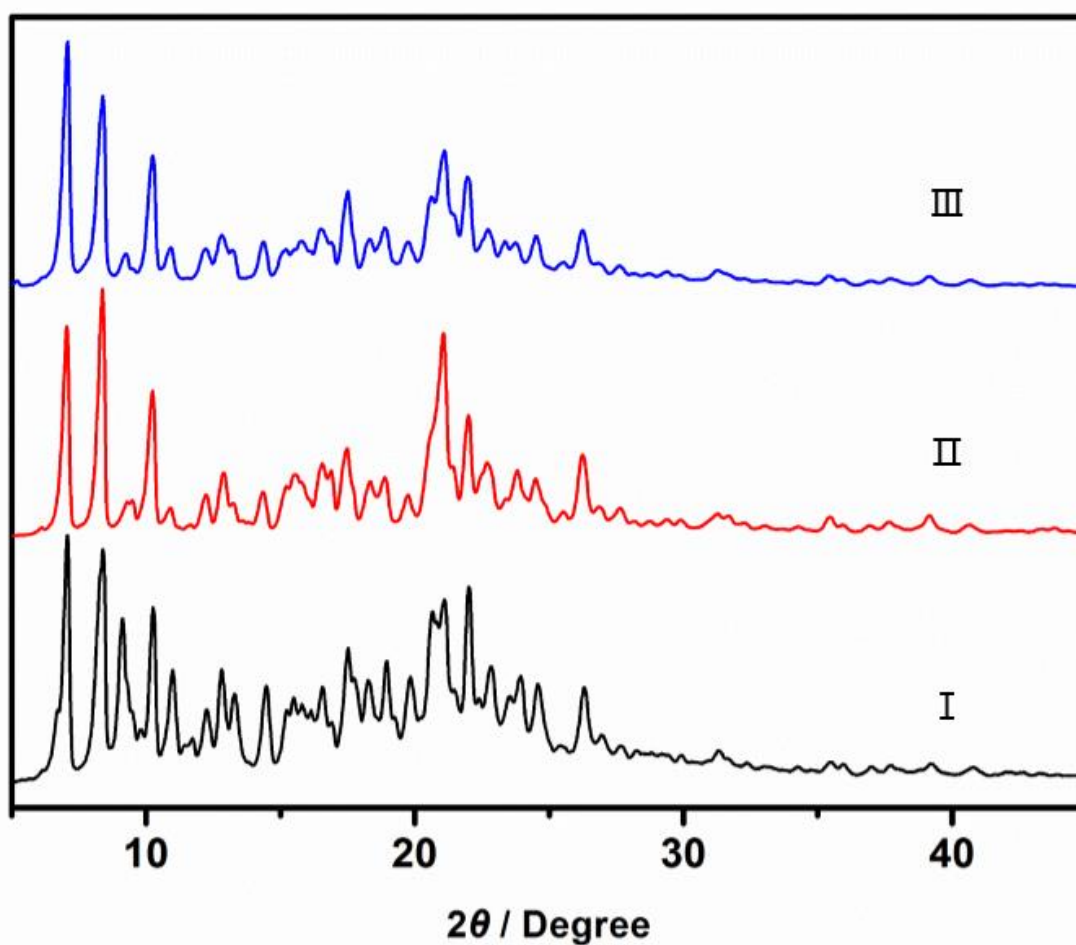

**Figure S21.** Powder X-ray diffraction patterns of **1**: (I) original **1a**; (II) **1a** after heating at 100 °C under vacuum for 2 h; (III) **1a** after 10 cycles.

## 10. References

S1. Zhou, J.; Yang, J.; Hua, B.; Shao, L.; Zhang, Z.; Yu, G. The Synthesis, Structure, and Molecular Recognition Properties of a [2]Calix[1]biphenyl-Type Hybrid[3]arene. *Chem. Commun.* **2016**, 52, 1622–1624.
